# Supplementary material
Source: Springer Nature journal article supplement (https://www.springermedizin.de/resource/supplementary/12985_2011_1508_MOESM2_ESM.pdf/9609980)
Supplement: MOESM2 [file 9609980]

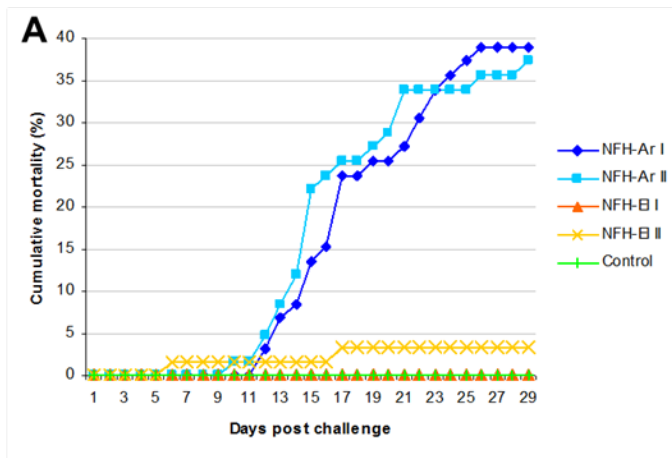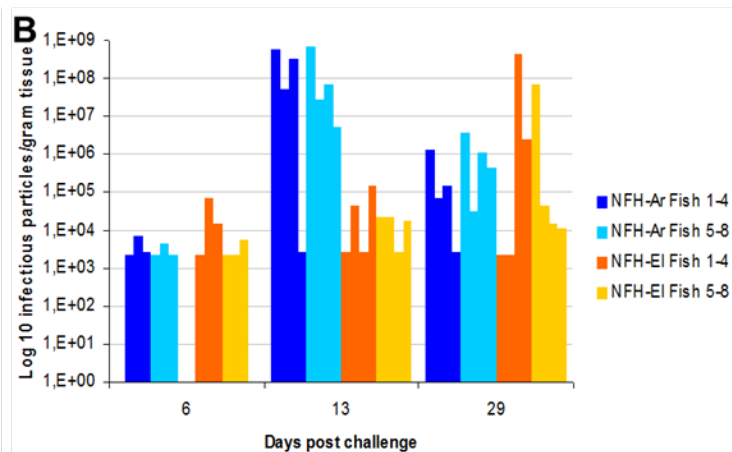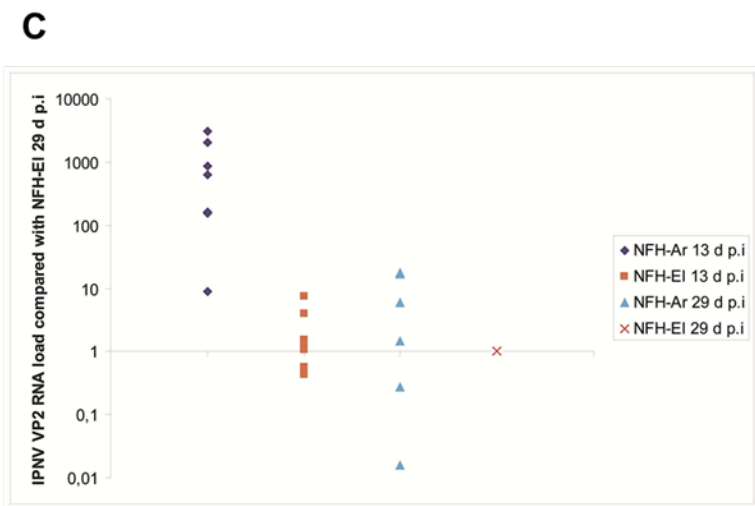

**D**

|        |    | VP2 Ct-values head kidney |              |
|--------|----|---------------------------|--------------|
|        |    | 13 d                      | 29 d         |
| NFH-Ar | F1 | -                         | 35,16        |
|        | F2 | 28,70                     | 37,12        |
|        | F3 | 26,76                     | not detected |
|        | F4 | 33,48                     | 35,76        |
|        | F5 | 26,51                     | 33,01        |
|        | F6 | 28,24                     | -            |
|        | F7 | 30,22                     | 35,10        |
|        | F8 | 29,81                     | 32,45        |
| NFH-EI | F1 | 34,07                     | not detected |
|        | F2 | 34,69                     | not detected |
|        | F3 | 35,72                     | 36,16        |
|        | F4 | 36,95                     | not detected |
|        | F5 | 36,32                     | 35,15        |
|        | F6 | 35,76                     | not detected |
|        | F7 | 36,86                     | 36,68        |
|        | F8 | 35,36                     | not detected |
